# Supplementary material for: In Vitro Antibacterial and Anti-Inflammatory Effects of Novel Insect Fungus Polycephalomyces phaothaiensis Extract and Its Constituents against Propionibacterium acnes
Source: PubMed Central journal article supplement (PMC7277416; doi:10.3390/antibiotics9050274), 2020-05-25
Supplement: antibiotics-09-00274-s001.pdf [file antibiotics-09-00274-s001.pdf]

# SUPPLEMENTARY MATERIALS

## 1. Fungal

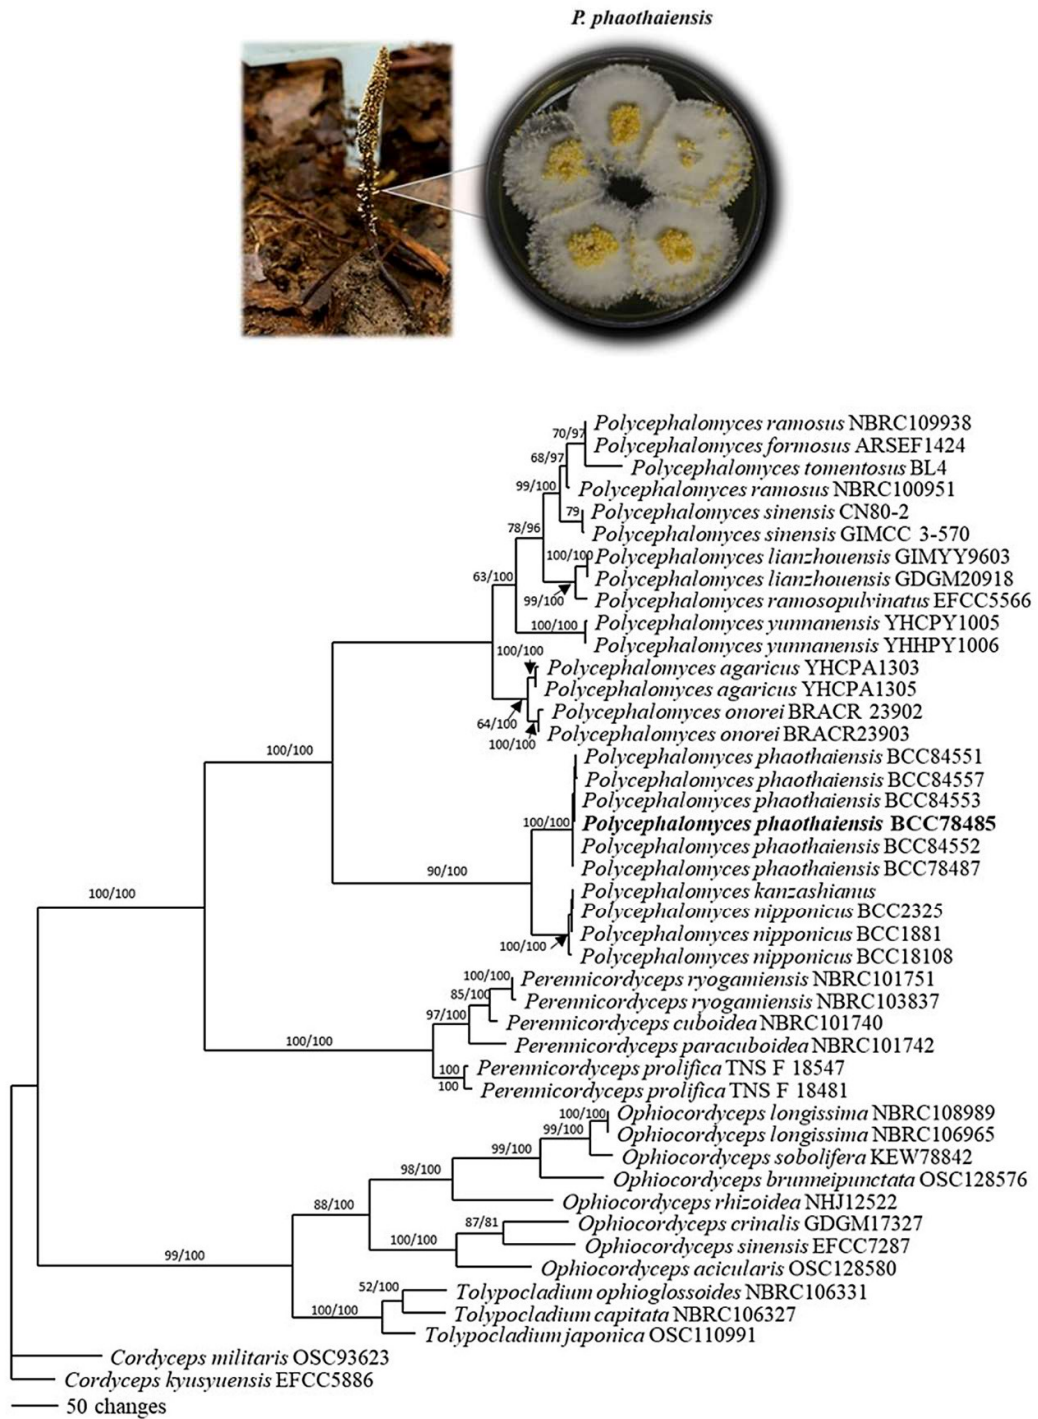

**Figure S1** Colony appearance and phylogenetic tree of *P. phaothaiensis* BCC78485

## 2. Isolated compounds

Cordyropolone (**1**): colorless solid, C<sub>9</sub>H<sub>8</sub>O<sub>4</sub>, ESI-MS (neg. ion mode) *m/z* 179.037 [M-H]<sup>-</sup>; FT-IR (ATR)  $\nu_{\text{max}}$  (cm<sup>-1</sup>): 3188, 1603, 1520, 1434, 1377, 1275, 1219, 1171, 917, 762, 710.

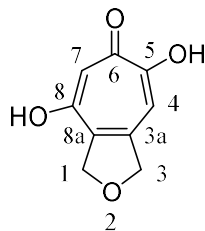

**Table S1.** NMR data of **1** (in DMSO-*d*<sub>6</sub>) measured at 400 (<sup>1</sup>H) and 100 (<sup>13</sup>C) MHz

| Position | $\delta_{\text{C}}$ (ppm) | $\delta_{\text{H}}$ (ppm), mult ( <i>J</i> in Hz) | <sup>1</sup> H- <sup>1</sup> H COSY | HMBC               |
|----------|---------------------------|---------------------------------------------------|-------------------------------------|--------------------|
| 1        | 75.1                      | 4.95 <i>t</i> (2.84, 3.16)                        | 3                                   | 3, 3a, 4, 7, 8, 8a |
| 3        | 77.9                      | 5.02, <i>t</i> (2.96, 3.12)                       | 1, 4                                | 1, 3a, 4, 5, 8, 8a |
| 3a       | 145.6                     | -                                                 | -                                   | -                  |
| 4        | 106.6                     | 6.81, <i>s</i>                                    | 3                                   | 3, 3a, 5, 6, 8a    |
| 5        | 164.4                     | -                                                 | -                                   | -                  |
| 6        | 173.1                     | -                                                 | -                                   | -                  |
| 7        | 113.2                     | 6.79, <i>s</i>                                    | -                                   | 1, 3a, 5, 6, 8, 8a |
| 8        | 162.1                     | -                                                 | -                                   | -                  |
| 8a       | 127.5                     | -                                                 | -                                   | -                  |

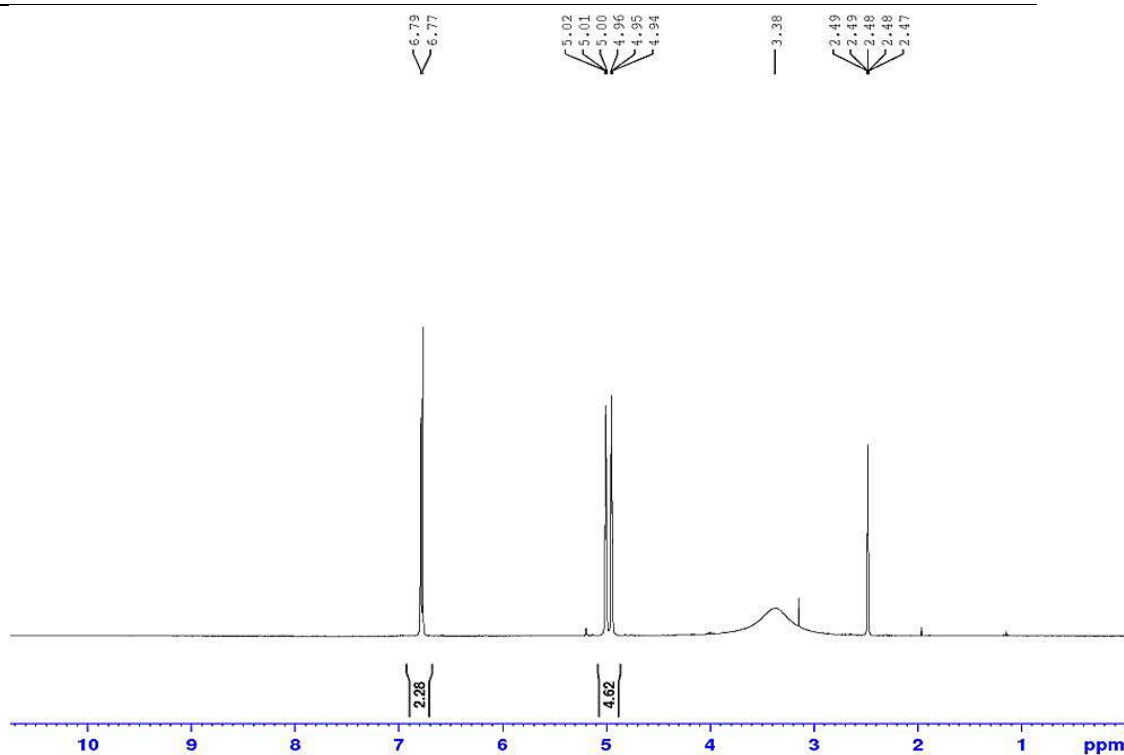

**Figure S2** <sup>1</sup>H-NMR spectrum of **1** (400 MHz, DMSO-*d*<sub>6</sub>)

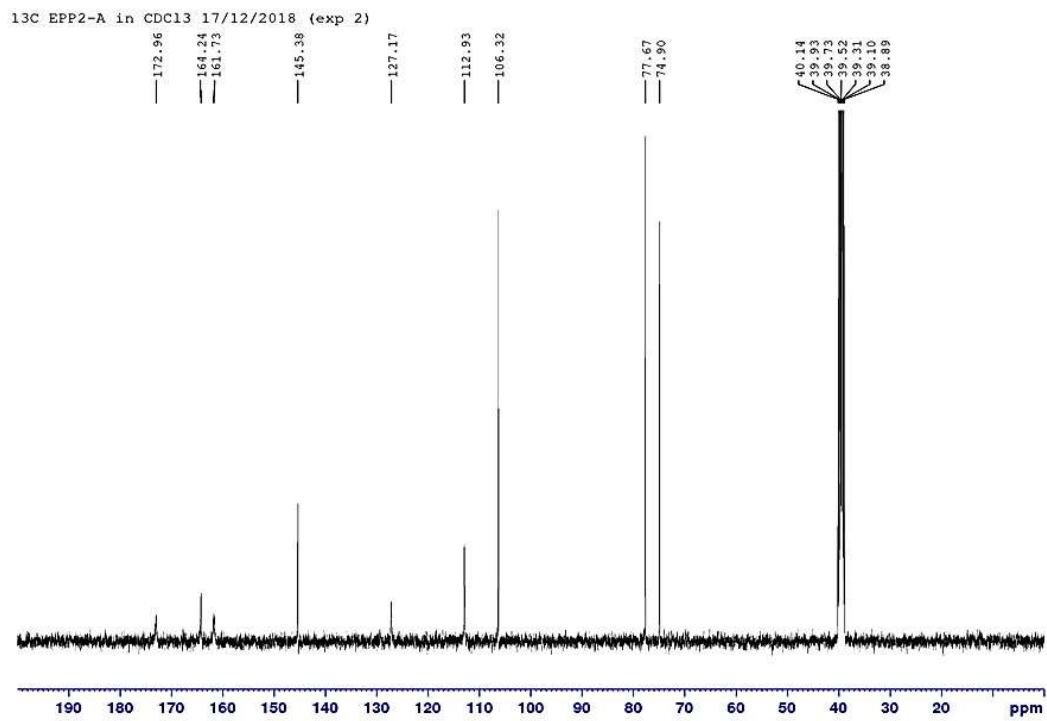

Figure S3  $^{13}\text{C}$ -NMR spectrum of **1** (100 MHz,  $\text{DMSO-}d_6$ )

Stipitalide (**2**): reddish-brown amorphous, C<sub>9</sub>H<sub>7</sub>O<sub>5</sub>, ESI-MS (pos. ion mode) *m/z* 195.0292 [M+H]<sup>+</sup>, FT-IR (ATR)  $\nu_{\max}$  (cm<sup>-1</sup>): 3146, 1716, 1628, 1482, 1228, 1168, 1048, 1028. <sup>1</sup>H-NMR (DMSO-*d*<sub>6</sub>)  $\delta$  (ppm): 6.88 (1H, *s*, H-7), 6.82 (1H, *s*, H-3), 5.25 (2H, *s*, H-9), <sup>13</sup>C-NMR (DMSO-*d*<sub>6</sub>)  $\delta$  (ppm): 172.4 (C-1), 171.1 (C-8), 170.2 (C-2), 164.9 (C-4), 157.9 (C-6), 112.3 (C-3), 109.8 (C-5), 108.7 (C-7), 70.1 (C-9).

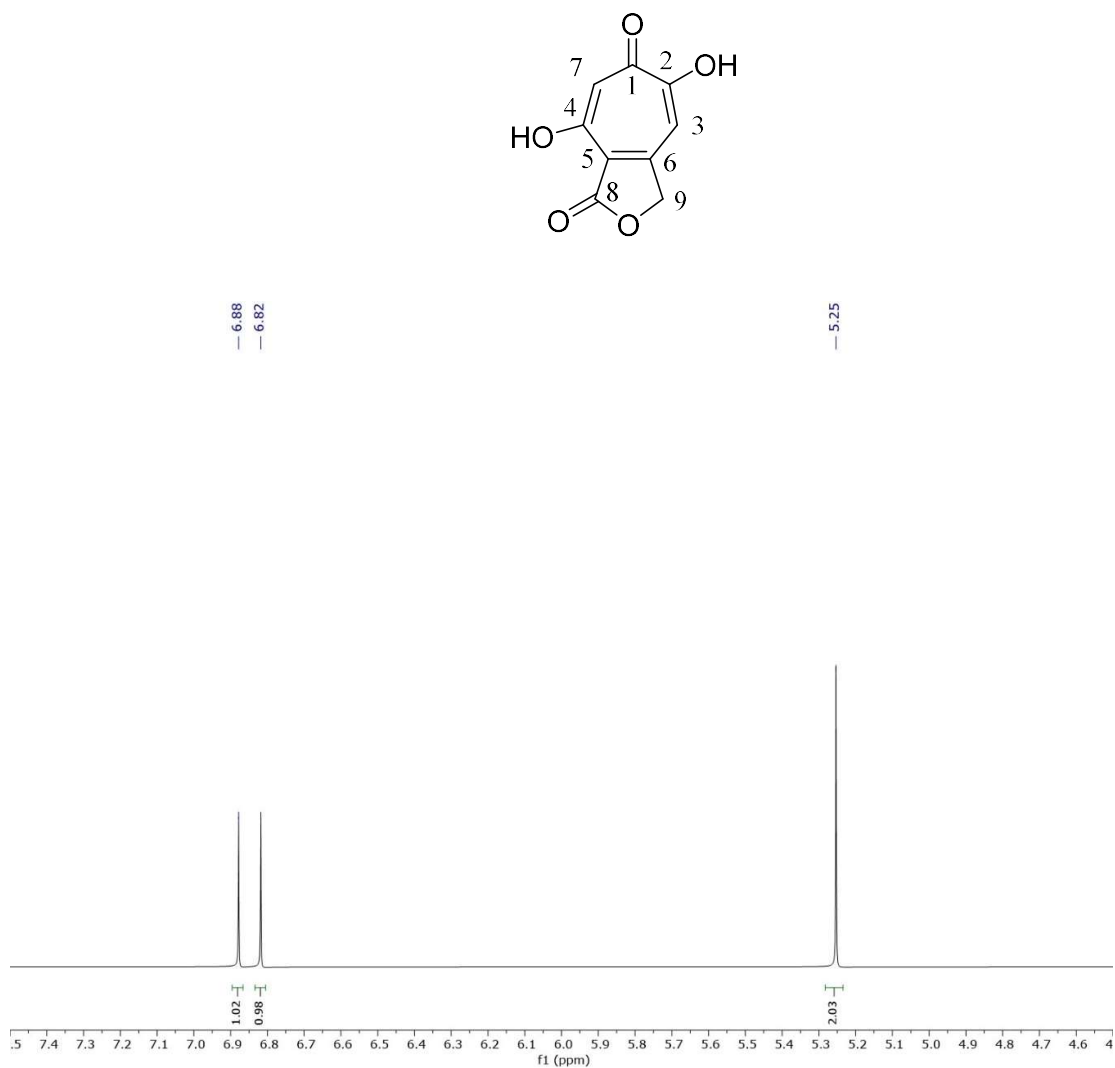

**Figure S4** <sup>1</sup>H-NMR spectrum of **2** (400 MHz, DMSO-*d*<sub>6</sub>)

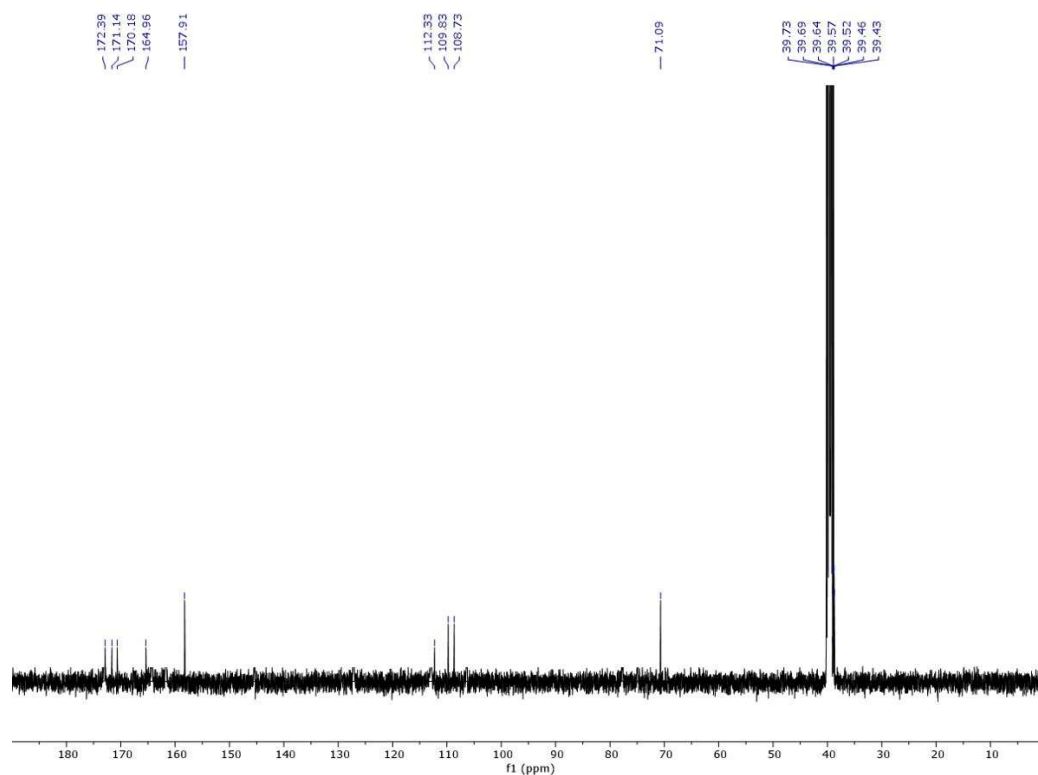

**Figure S5**  $^{13}\text{C}$ -NMR spectrum of **2** (100 MHz,  $\text{DMSO-}d_6$ )

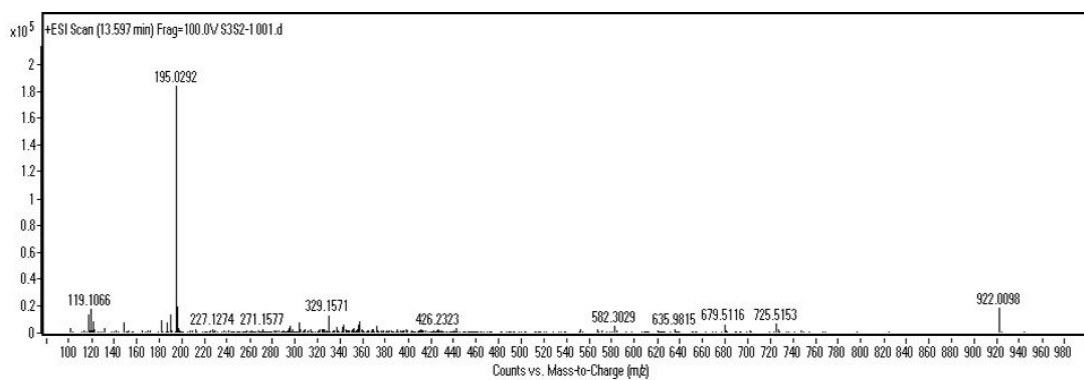

**Figure S6** ESI-MS (pos. ion mode) spectrum of **2**

(+)-Piliformic acid or (*R,E*)-2-hexylidene-3-methylsuccinic acid (**3**): white solid, C<sub>11</sub>H<sub>18</sub>O<sub>4</sub>; ESI-MS (neg. ion mode) *m/z* 213.119 [M-H]<sup>-</sup>; [ $\alpha$ ]<sub>D</sub><sup>28</sup> +1.3 (MeOH, *c* 0.155); UV (MeOH)  $\lambda_{\text{max}}$  (log  $\epsilon$ ) 241 nm (2.67); FT-IR (ATR)  $\nu_{\text{max}}$  (cm<sup>-1</sup>): 3250, 2926, 2857, 1684, 1626, 1410, 1292, 1256, 1223, 1058.

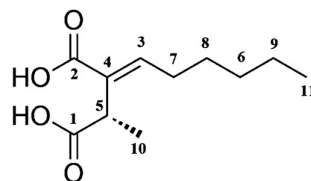

**Table S2**

NMR data of **3** (in CDCl<sub>3</sub>) measured at 400 (<sup>1</sup>H) and 100 (<sup>13</sup>C) MHz

| Position | $\delta_{\text{C}}$ (ppm) | $\delta_{\text{H}}$ (ppm), mult ( <i>J</i> in Hz) | <sup>1</sup> H- <sup>1</sup> H COSY | HMBC              |
|----------|---------------------------|---------------------------------------------------|-------------------------------------|-------------------|
| 1        | 180.2                     |                                                   |                                     |                   |
| 2        | 172.1                     |                                                   |                                     |                   |
| 3        | 147.5                     | 7.02, <i>t</i> (7.6)                              | 7                                   | 2, 4, 5, 7, 8, 10 |
| 4        | 131.2                     |                                                   |                                     |                   |
| 5        | 37.6                      | 3.67, <i>q</i> (7.1, 1.5)                         | 10                                  | 1, 2, 3, 4, 10    |
| 6        | 31.6                      | 1.24-1.34, <i>m</i>                               | 8, 9                                | 7, 8, 9, 11       |
| 7        | 28.9                      | 2.34-2.13, <i>m</i>                               | 8                                   | 2, 3, 4, 6, 8     |
| 8        | 28.2                      | 1.48, <i>m</i>                                    | 6, 7                                | 3, 6, 7, 9        |
| 9        | 22.5                      | 1.24-1.34, <i>m</i>                               | 6, 11                               | 6, 8, 11          |
| 10       | 15.6                      | 1.36, <i>d</i> (7.1)                              | 5                                   | 1, 4, 5           |
| 11       | 14.0                      | 0.89, <i>m</i>                                    | 9                                   | 6, 9              |

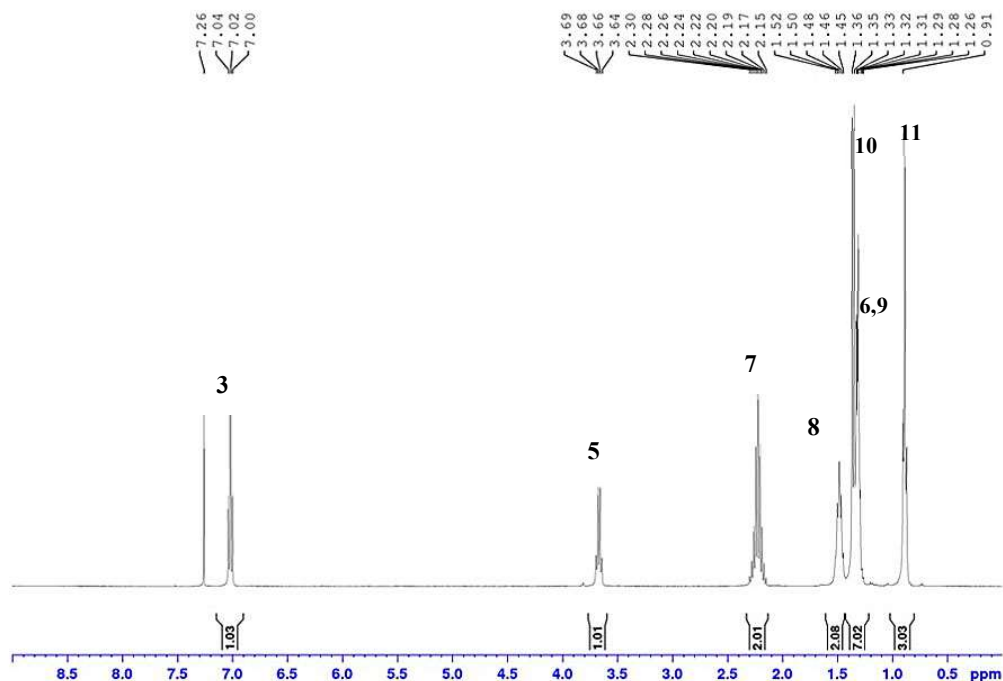

**Figure S7** <sup>1</sup>H-NMR spectrum of **3** (400 MHz, CDCl<sub>3</sub>)

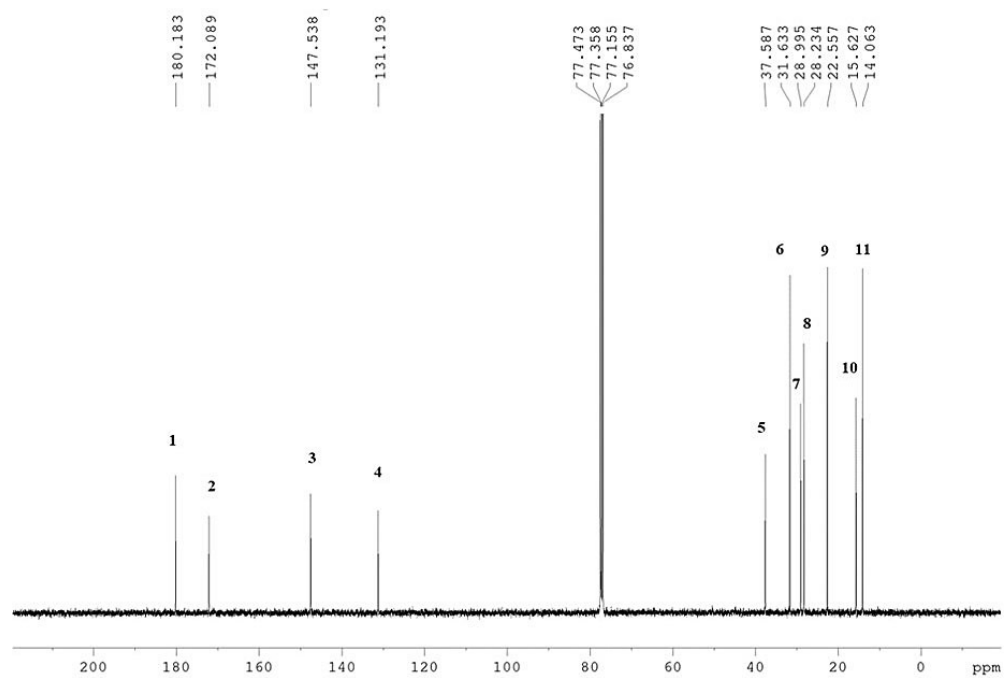

**Figure S8**  $^{13}\text{C}$ -NMR spectrum of **3** (400 MHz,  $\text{CDCl}_3$ )

D-manitol (**4**): white solid, C<sub>6</sub>H<sub>14</sub>O<sub>6</sub>, ESI-MS (pos. ion mode) *m/z* 205.0679 [M+Na]<sup>+</sup>; FT-IR (ATR)  $\nu_{\text{max}}$  (cm<sup>-1</sup>): 3234, 2875, 1635, 1411, 1363, 1062, 1032, 985. <sup>1</sup>H-NMR (D<sub>2</sub>O)  $\delta$  (ppm): 3.88 (1H, *dd*, *J* = 11.7, 2.6 Hz, H-1a), 3.82 (1H, *d*, *J* = 8 Hz, H-3), 3.77 (1H, *m*, H-2), 3.69 (1H, *dd*, *J* = 11.6, 5.9 Hz, H-1b).

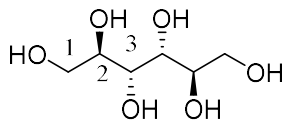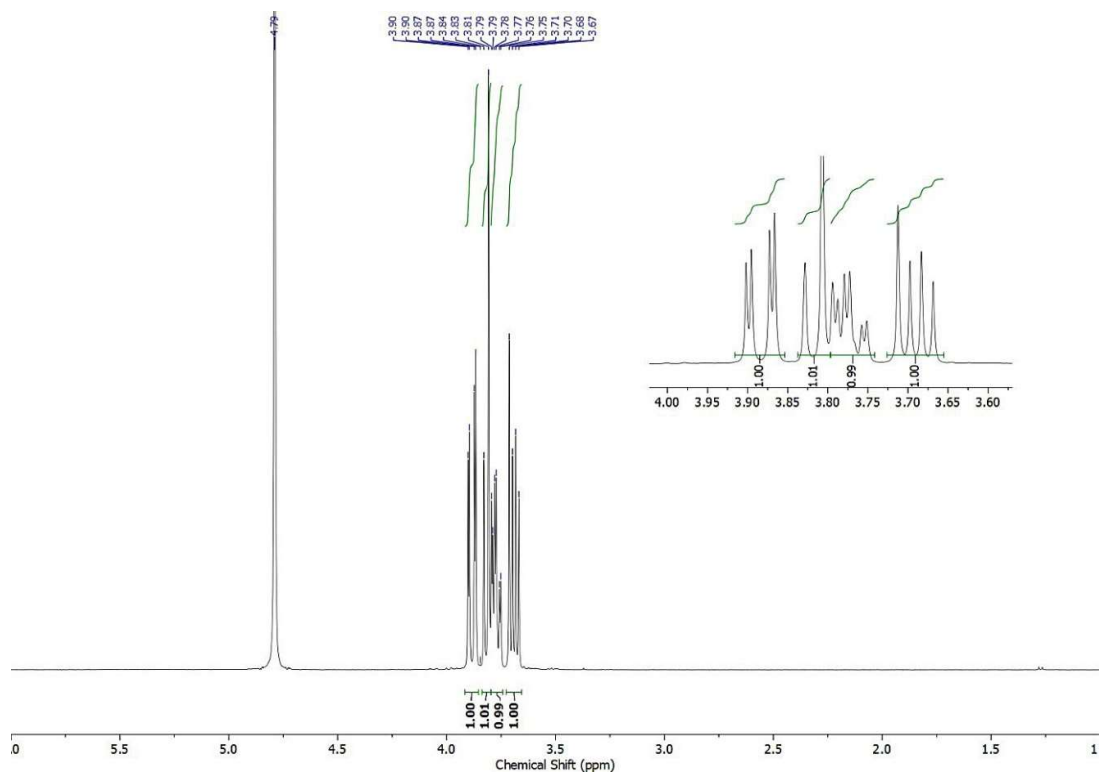

**Figure S9** <sup>1</sup>H-NMR spectrum of **4** (400 MHz, D<sub>2</sub>O)



Methyl linoleate (**5**): colorless oil, C<sub>19</sub>H<sub>34</sub>O<sub>2</sub>, EI-MS *m/z* 294 [M]<sup>+</sup> <sup>1</sup>H-NMR (CDCl<sub>3</sub>) δ (ppm): 5.42-5.27 (4H, *m*, H-9, H-10, H-12, H-13), 2.77 (2H, *t*, *J*= 6.6 Hz, H-11), 2.29 (2H, *dt*, *J*= 9.7, 7.5 Hz, H-2), 2.03 (8H, *dq*, *J*= 15.2, 6.8 Hz, H-8, H-14), 1.62 (2H, *t*, *J*= 6.9 Hz, H-3), 1.57 (3H, *s*, H-1'), 1.39-1.20 (14H, *m*, H-4, H-5, H-6, H-7, H-15, H-16, H-17), 1.09-0.76 (3H, *m*, H-18). A mass spectrum of **5** was also determined by GC-MS computer matching with Wiley7n library (99% matching).

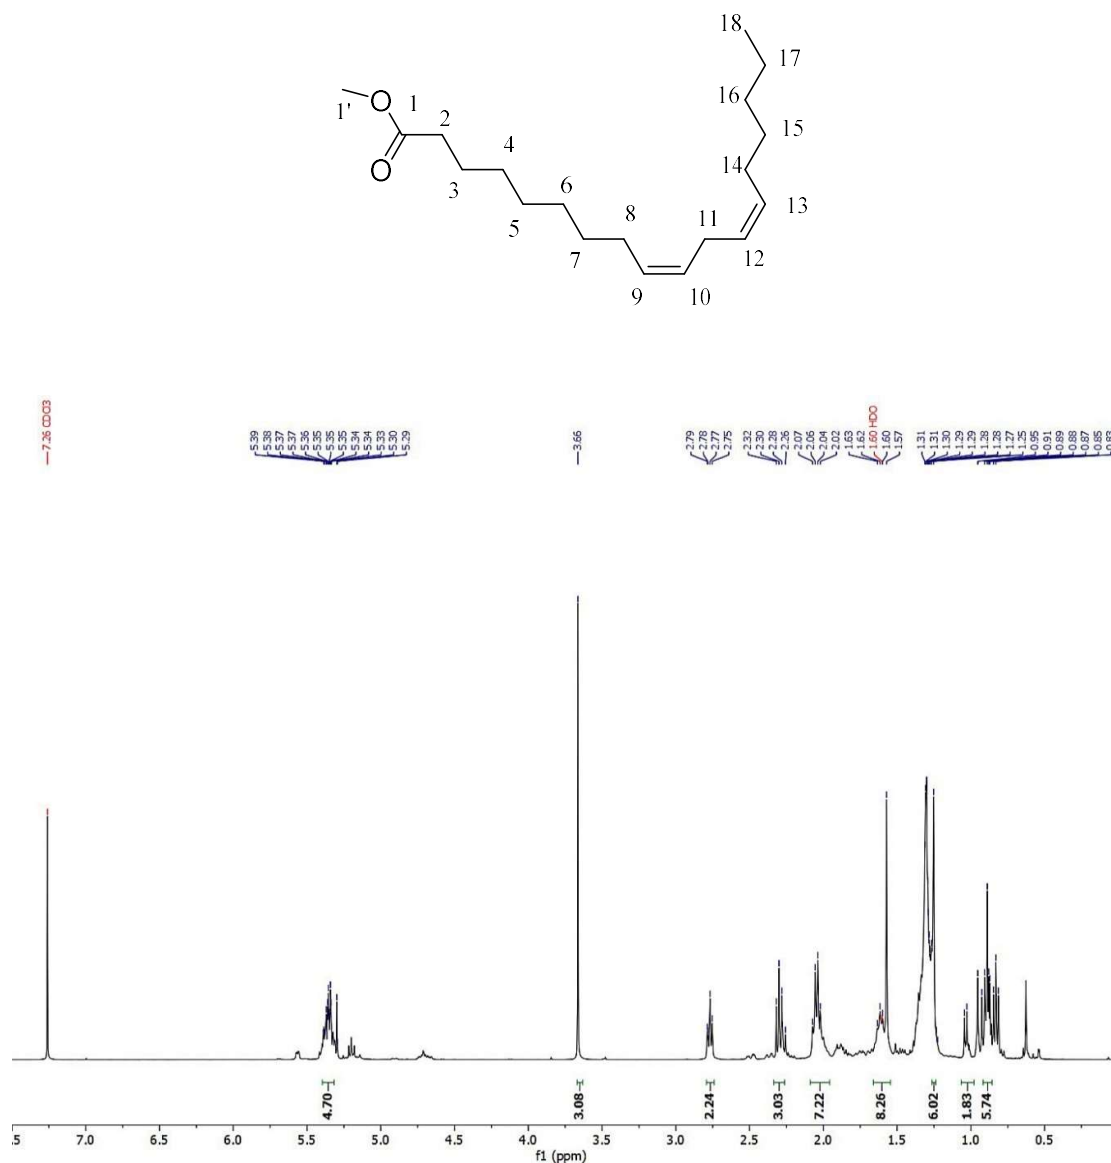

Figure S10 <sup>1</sup>H-NMR spectrum of **5** (400 MHz, CDCl<sub>3</sub>)

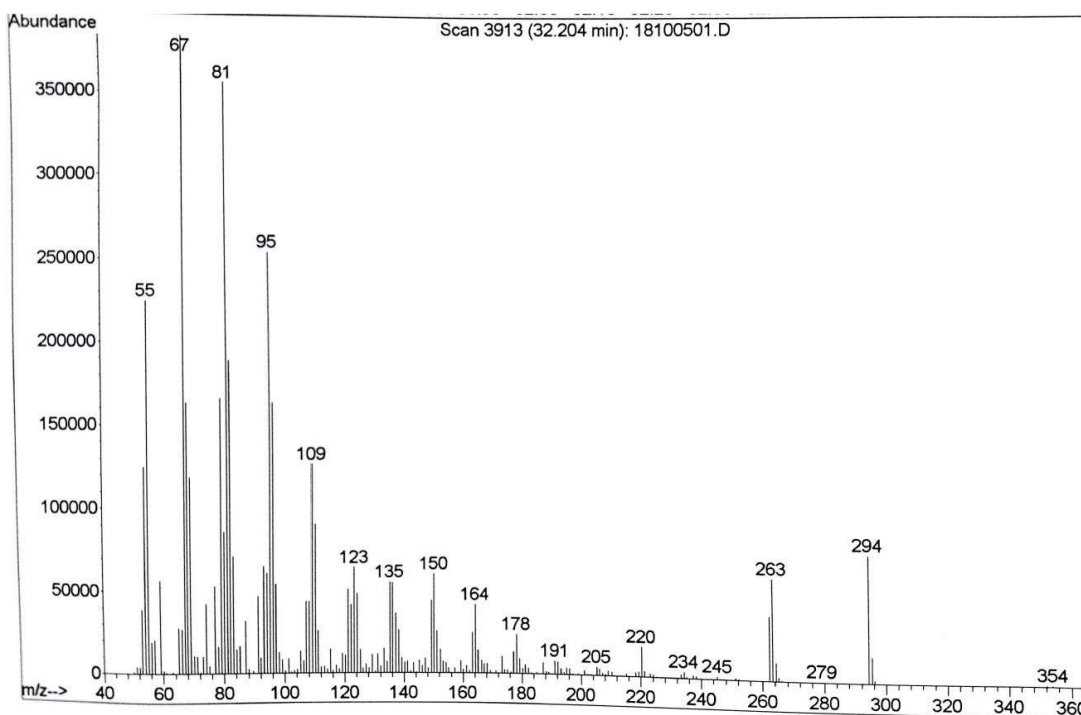

**Figure S11** EI-MS spectrum of **5**

Linoleic acid (**6**): colorless oil,  $C_{18}H_{32}O_2$ , EI-MS  $m/z$  280  $[M]^+$ .  $^1H$ -NMR ( $CDCl_3$ )  $\delta$  (ppm): 5.36 (4H, *qt*,  $J = 8.4, 4.3$  Hz, H-9, 10, 12, 13), 2.77 (2H, *t*,  $J = 6.3$  Hz, H-11), 2.35 (2H, *t*,  $J = 7.5$  Hz, H-2), 2.04 (8H, *p*,  $J = 7.9, 7.3$  Hz, H-8, 14), 1.63 (2H, *p*,  $J = 7.4$  Hz, H-3), 1.29 (14H, *m*, H-4, 5, 6, 7, 15, 16, 17), 0.88 (3H, *td*,  $J = 6.7, 6.0, 3.2$  Hz, H-18). A mass spectrum of **6** was also determined by GC-MS computer matching with Wiley7n library (96% match).

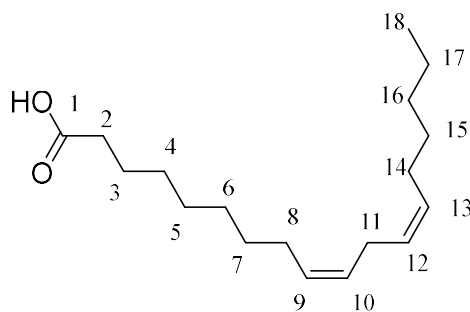

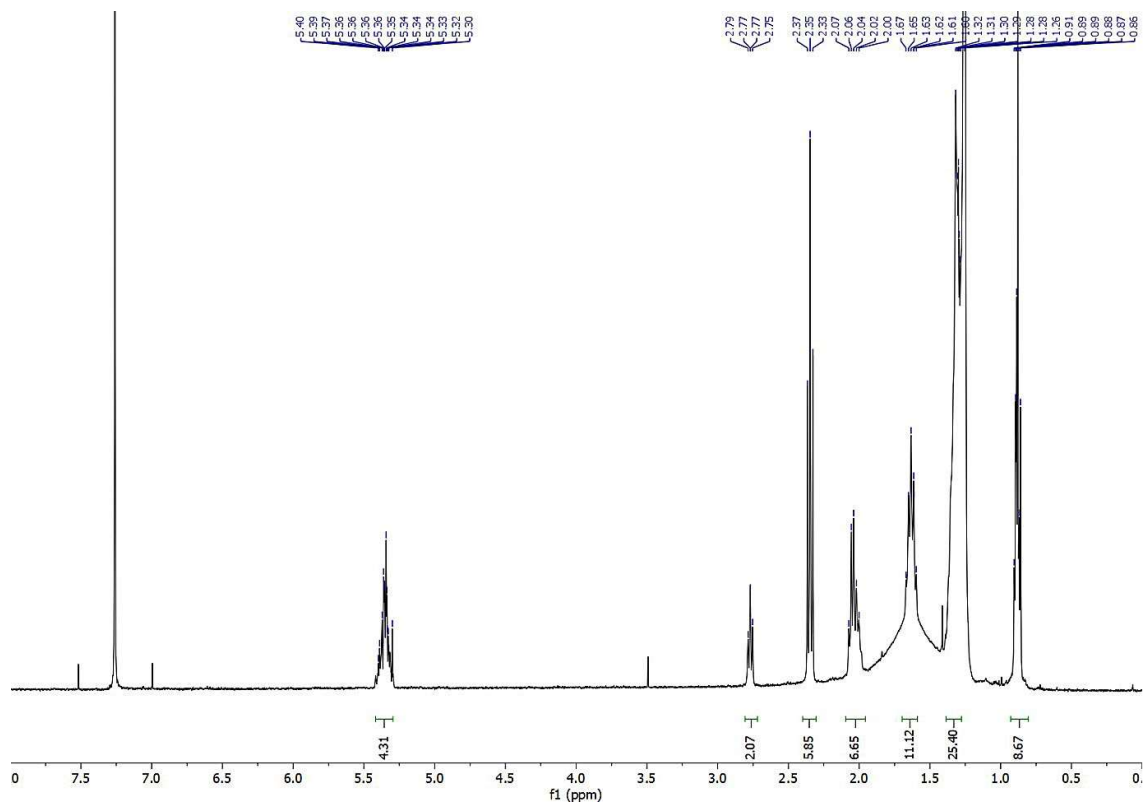

Figure S12  $^1\text{H-NMR}$  spectrum of **6** (400 MHz,  $\text{CDCl}_3$ )

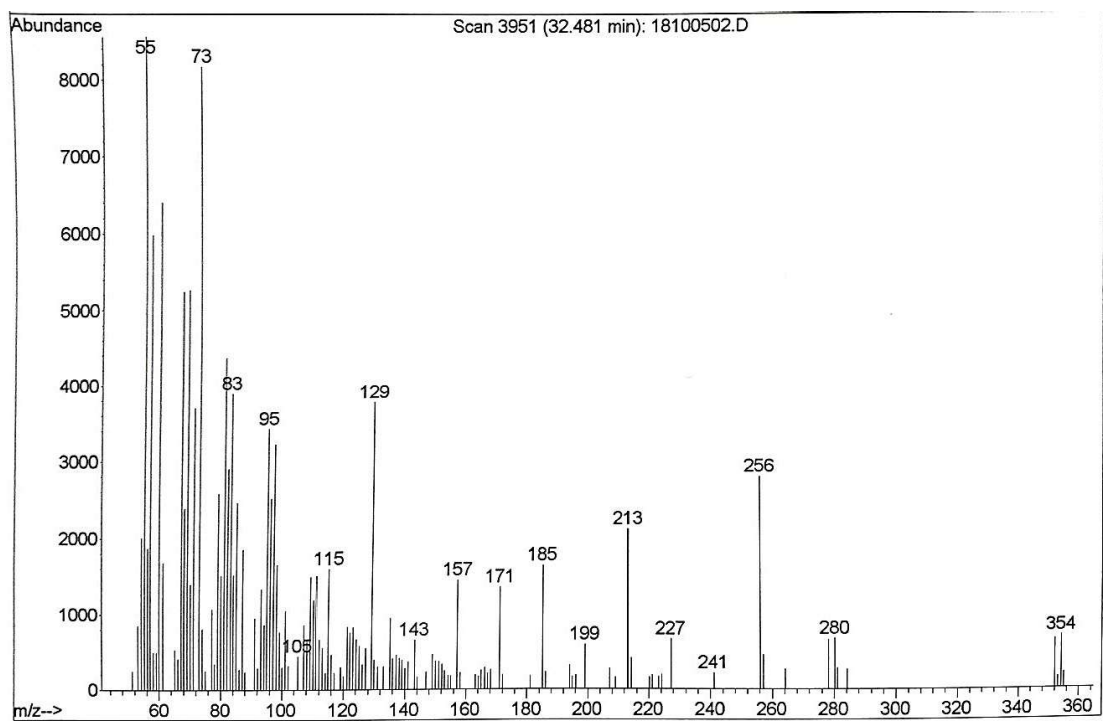

Figure S13 EI-MS spectrum of **6**

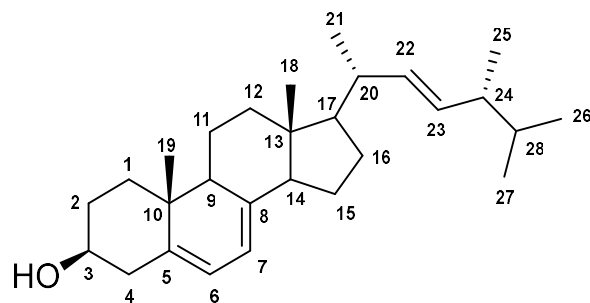

Ergosterol (**7**) Colorless solid,  $C_{28}H_{44}O$ , ESI-MS (pos. ion mode)  $m/z$  396.65  $[M+H]^+$ ; FT-IR (ATR)  $\nu_{max}$  ( $cm^{-1}$ ): 3413, 2952, 2869, 1738, 1656, 1457, 1366, 1326, 1239, 1053, 1031, 967, 802.  $^1H$ -NMR ( $CDCl_3$ )  $\delta$  (ppm): 5.57(1H, *dd*,  $J = 5.8, 2.6$  Hz, H-6), 5.38(1H, *dt*,  $J = 5.6, 2.8$  Hz, H-8), 5.28–5.12 (2H, *m*, H-22, H-23), 3.69–3.58 (1H, *m*, H-3). The position of this signal varied from 1.20–2.50 ppm in the other saturated methylene and methine protons (total 21H); 1.03 (3H, *d*,  $J = 6.7$  Hz, H-21), 0.95 (3H, *s*, H-19), 0.91, 0.93 (3H, *d*,  $J = 6.8$  Hz, H-28), 0.83, 0.85 (3H, *d*,  $J = 6.7$  Hz, H-26), 0.81, 0.84 (3H, *d*,  $J = 6.7$  Hz, H-27), 0.63 (3H, *s*, H-18).

$^{13}C$ -NMR ( $CDCl_3$ )  $\delta$  (ppm): 141.5 (C-8), 139.9 (C-5), 135.7 (C-22), 132.1 (C-23), 119.7 (C-6), 116.4 (C-7), 70.6 (C-3), 55.8 (C-17), 54.7 (C-14), 46.4 (C-9), 42.9 (C-13), 42.9 (C-24), 40.9 (C-4), 40.5 (C-20), 39.2 (C-12), 38.5 (C-1), 37.1 (C-10), 33.2 (C-25), 32.1 (C-2), 28.4 (C-16), 23.1 (C-15), 21.2 (C-21), 20.1 (C-11), 19.8 (C-27), 19.6 (C-26), 17.7 (C-19), 16.4 (C-28), 12.2 (C-18)

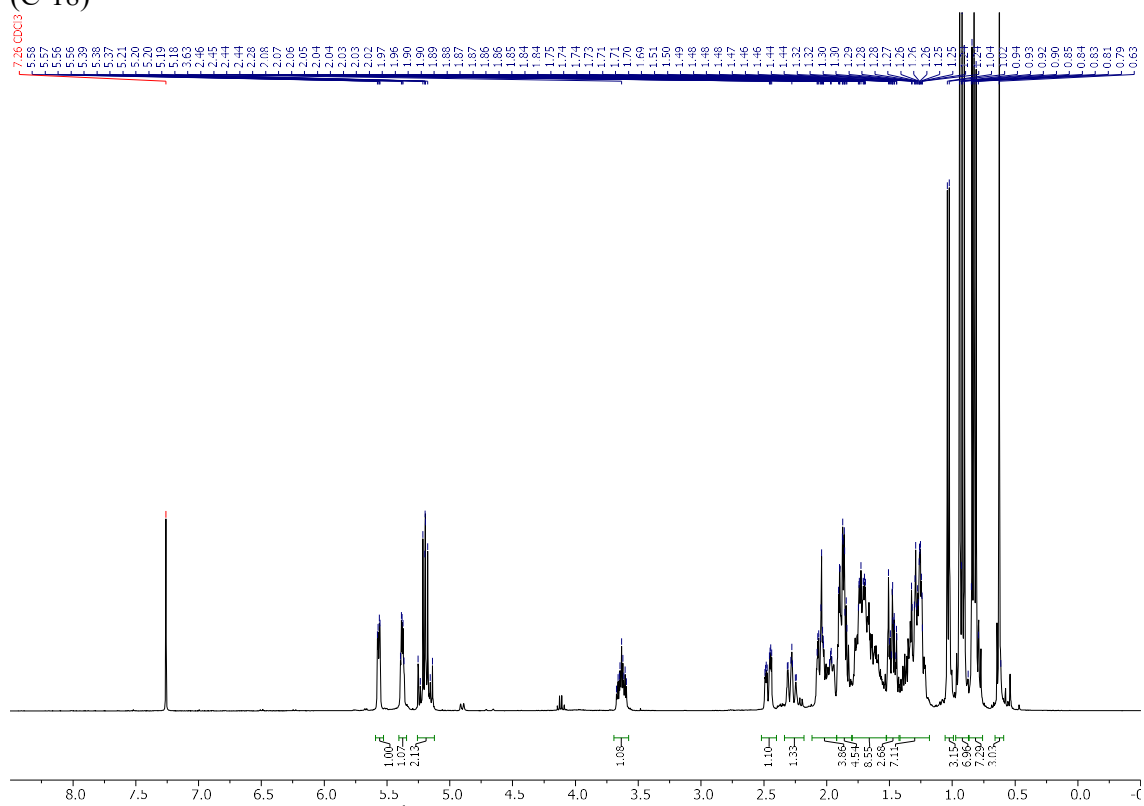

Figure S14  $^1H$ -NMR spectrum of **7** (400 MHz,  $CDCl_3$ )

20180905.4.fid  
13C Ergosterol in CDCl3 05/09/2018 (exp.4)

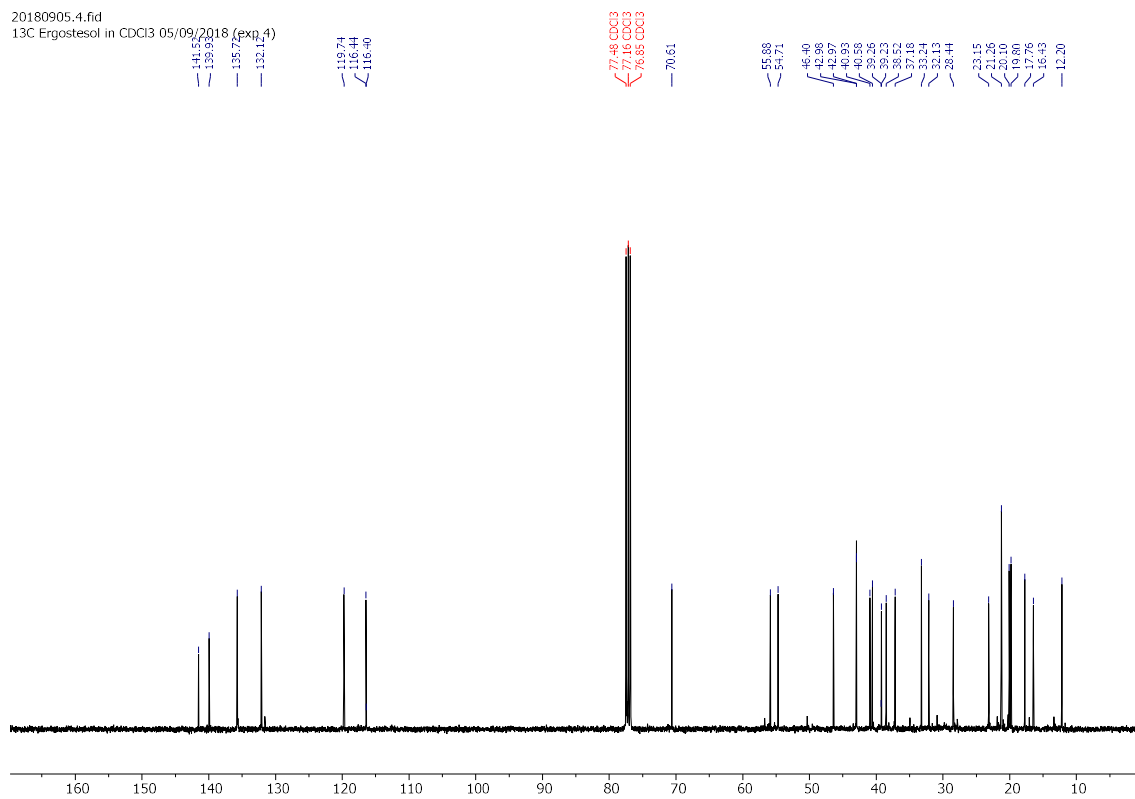

Figure S15  $^{13}\text{C}$ -NMR spectrum of 7 (100 MHz,  $\text{CDCl}_3$ )

### 3. Antibacterial activity

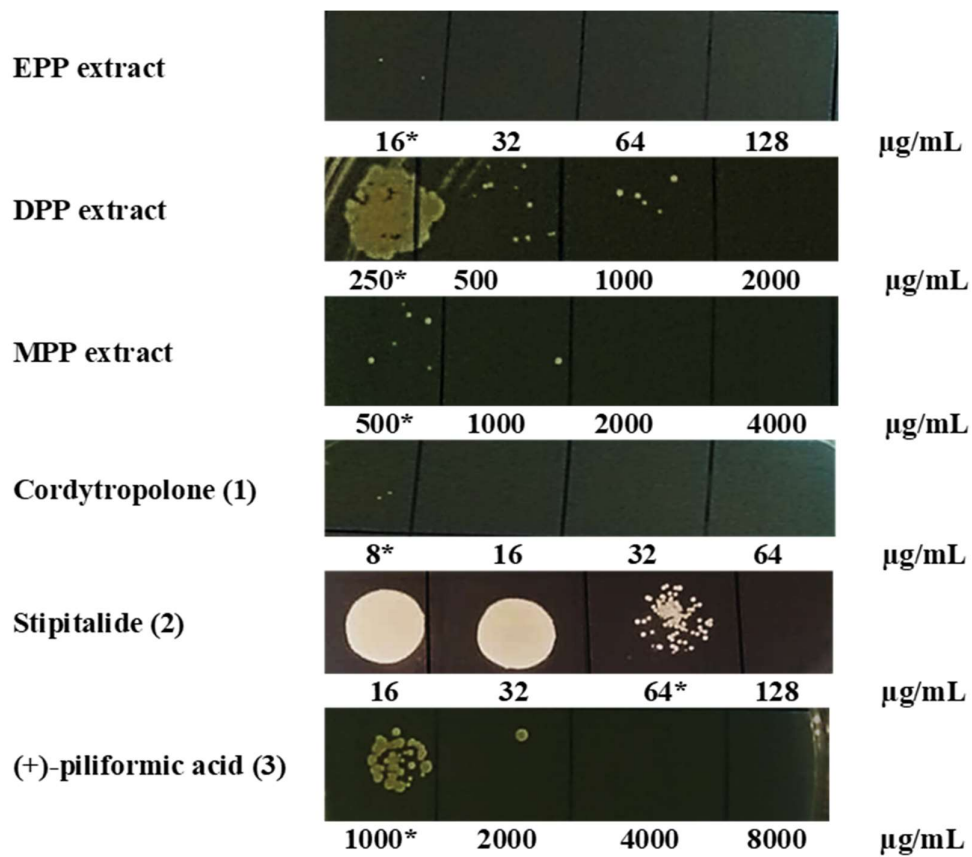

**Figure S16** Minimum bactericidal concentration (MBC) test of extracts, cordytropolone (1), stipitalide (2), and (+)-piliformic acid (3) from *P. phaothaiensis* against *P. acnes* (A).  
\*concentration at MIC values
